# Supplementary material for: Surface passivation by congeneric quantum dots for high-performance and stable CsPbBr3-based photodetectors
Source: Royal Society of Chemistry journal article supplement (doi:10.1039/d1tc01933c), 2021-01-01
Supplement: d1tc01933c1.pdf [file d1tc01933c1.pdf]

1  
2  
3  
4  
5  
6  
7  
8  
9  
10  
11  
12  
13  
14

## Electronic Supporting Information

### Surface Passivation by Congeneric Quantum Dots for High-Performance and Stable CsPbBr<sub>3</sub>-Based Photodetectors

Shikai Yan,<sup>a</sup> Sheng Tang,<sup>a</sup> Manman Luo,<sup>a</sup> Lu Xue,<sup>a</sup> Shilin Liu,<sup>a</sup> Elias Emeka Elemike,<sup>b</sup> Byung Seong Bae,<sup>c</sup> Javed Akram,<sup>d</sup> Jing Chen,<sup>a</sup> Zhiwei Zhao,<sup>a</sup> Zhuoya Zhu,<sup>a</sup> Xiaobing Zhang,<sup>a</sup> Wei Lei<sup>\*a</sup> and Qing Li<sup>\*a</sup>

<sup>a</sup> Joint International Research Laboratory of Information Display and Visualization, School of Electronic Science and Engineering, Southeast University, Nanjing, Jiangsu, P. R. China

<sup>b</sup> Chemistry Department, North-West University, South Africa

<sup>c</sup> Department of Electronics & Display Engineering, Hoseo University, Hoseo Ro 79, Asan city, Chungnam 31499, Korea

<sup>d</sup> Department of Physics, COMSATS University Islamabad, Islamabad 45550, Pakistan

E-mail: [lw@seu.edu.cn](mailto:lw@seu.edu.cn); [liqing@seu.edu.cn](mailto:liqing@seu.edu.cn)

## Contents

- 1
- 2 (1) Figure S1. Detailed characterization of CsPbBr<sub>3</sub> QDs.
- 3 (2) Figure S2. EDX measurement of CsPbBr<sub>3</sub> films without and with QDs on the surface.
- 4 (3) Figure S3. Schematic diagram depicting the function of CsPbBr<sub>3</sub> QDs. AFM results of CsPbBr<sub>3</sub> films WO and
- 5 with QDs.
- 6 (4) Figure S4. XPS spectra of CsPbBr<sub>3</sub> films WO and with CsPbBr<sub>3</sub> QDs.
- 7 (5) Figure S5. Device performance of the PDs using QDs with different purification cycles.
- 8 (6) Table S1 The VBM and CBM values of CsPbBr<sub>3</sub> film without and with QDs
- 9 (6) Figure S6. UPS spectra and energy-level diagram of CsPbBr<sub>3</sub> films without and with QDs.
- 10 (7) Figure S7. Responsivity and detectivity curves of the QDs-modified PDs at 0.04V.
- 11 (7) Figure S8. I-V curves of QDs-modified PDs under 409 nm light with different luminous densities.
- 12 (8) Figure S9. Photoresponse characteristics of the QDs-modified PDs to pulsed light irradiation at different
- 13 frequencies.
- 14 (9) Figure S10. Water contact angle on the CsPbBr<sub>3</sub> films without and with QDs.
- 15 (10) Table S2. Fitting parameters extracted from EIS test.

1

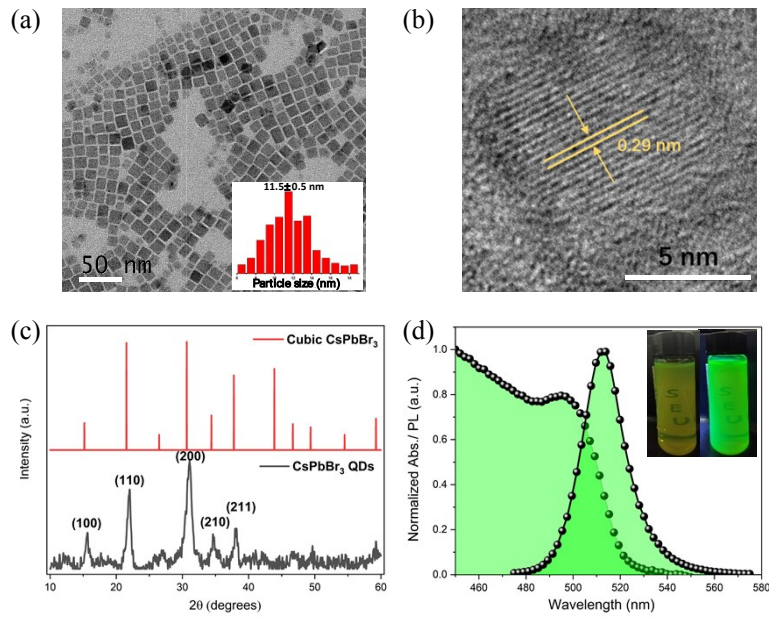

2

3 **Figure S1.** (a) TEM and (b) HRTEM images of CsPbBr<sub>3</sub> QDs. (c) XRD pattern of CsPbBr<sub>3</sub> QDs. (d) UV-vis absorption and PL spectra of the  
4 prepared CsPbBr<sub>3</sub> QDs in 1-octane. The inset shows the pictures of CsPbBr<sub>3</sub> QDs in the ambient air and UV light.

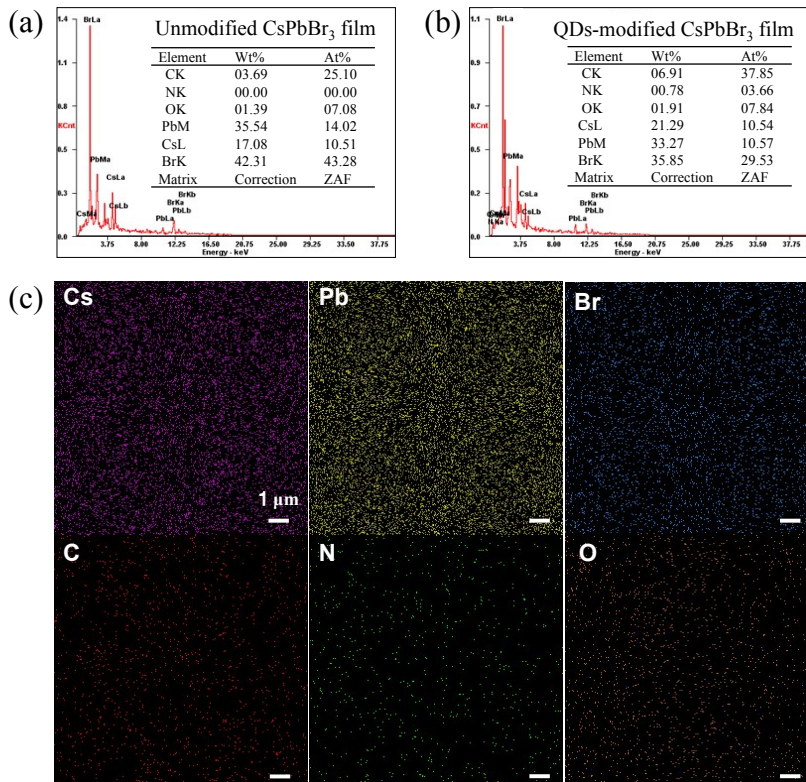

5

6 **Figure S2.** (a, b) EDX measurement of CsPbBr<sub>3</sub> films without and with QDs on the surface. (c) EDX mapping of QDs-modified CsPbBr<sub>3</sub> film.

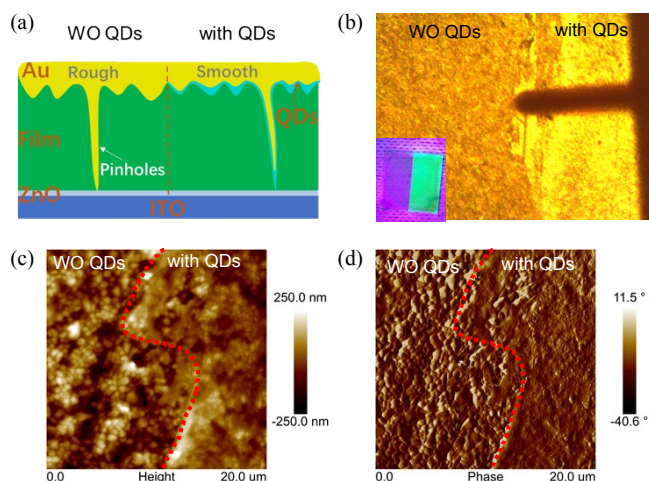

1  
 2 **Figure S3.** (a) Illustration depicting the function of CsPbBr<sub>3</sub> QDs as buffer layer in PDs. (b) Optical microscope image and camera picture  
 3 (inset) of the as-prepared sample, half of which is covered by QDs. (c) AFM height and (d) phase patterns of CsPbBr<sub>3</sub> films WO and with  
 4 CsPbBr<sub>3</sub> QDs on the surface.

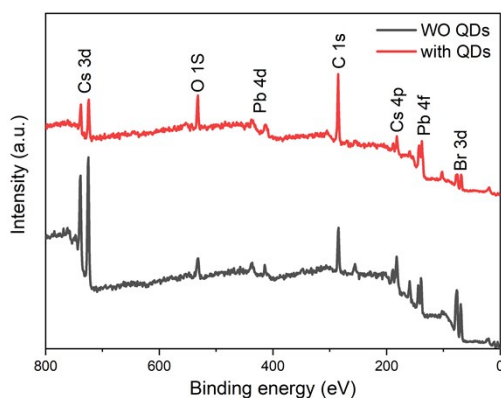

5  
 6 **Figure S4.** XPS spectra of CsPbBr<sub>3</sub> films WO and with CsPbBr<sub>3</sub> QDs.

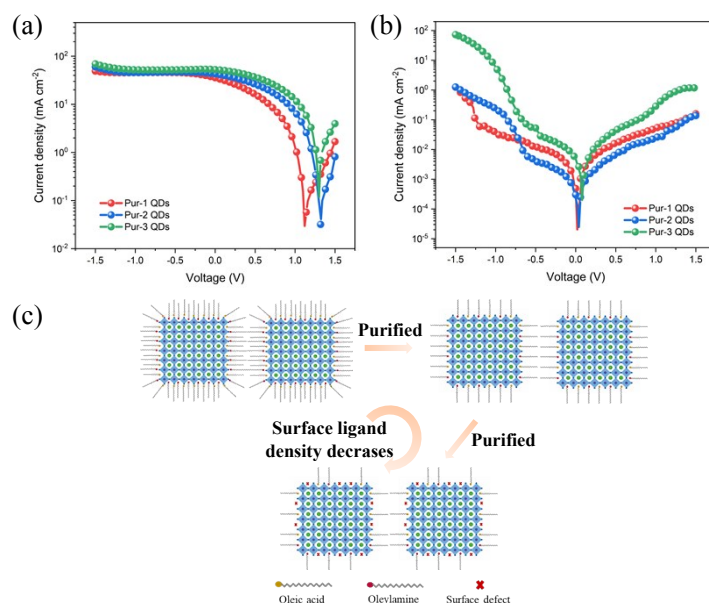

7  
 8 **Figure S5.** Current density–voltage ( $J$ – $V$ ) curves of the PDs using QDs with one to three purification cycles under (a) 409 nm light with  
 9 intensity of  $100 \text{ mW cm}^{-2}$  and (b) dark condition. (c) Schematic diagram of the change of ligands densities and surface defects densities

1 after different purification cycles.

2

**Table S1.** The VBM and CBM values of CsPbBr<sub>3</sub> film without and with QDs

| Sample                                | VBM (eV) | CBM (eV) |
|---------------------------------------|----------|----------|
| Unmodified CsPbBr <sub>3</sub> film   | 5.61     | 3.25     |
| QDs-modified CsPbBr <sub>3</sub> film | 5.58     | 3.22     |

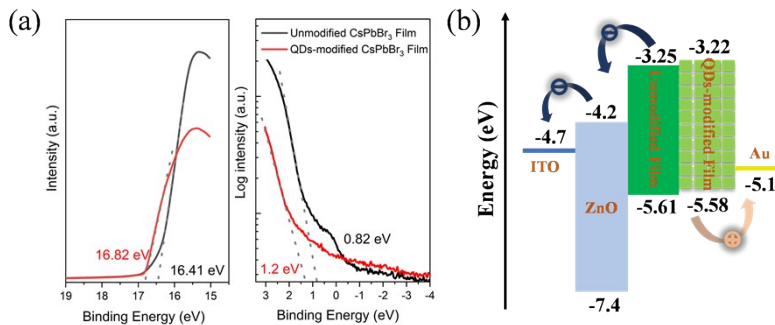

3

4 **Figure S6.** (a) UPS spectra of the unmodified perovskite films and QDs-modified CsPbBr<sub>3</sub> films. (b) Energy-level diagram of the materials used

5 in the PDs.

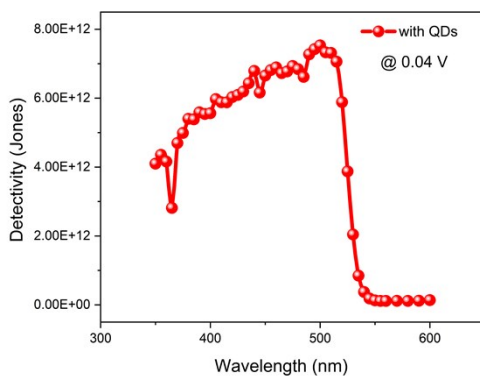

6

7 **Figure S7.** Responsivity and detectivity curves of the QDs-modified PDs as a function of light wavelength at 0.04 V.

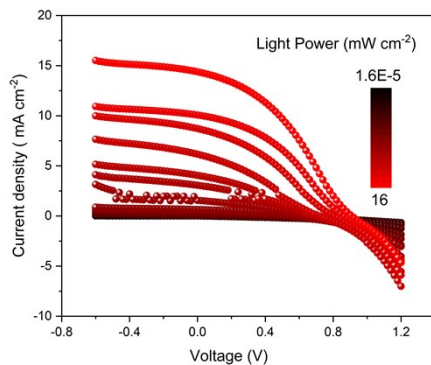

8

9 **Figure S8.** I-V curves of QDs-modified PDs under 409 nm light illumination with different luminous densities.

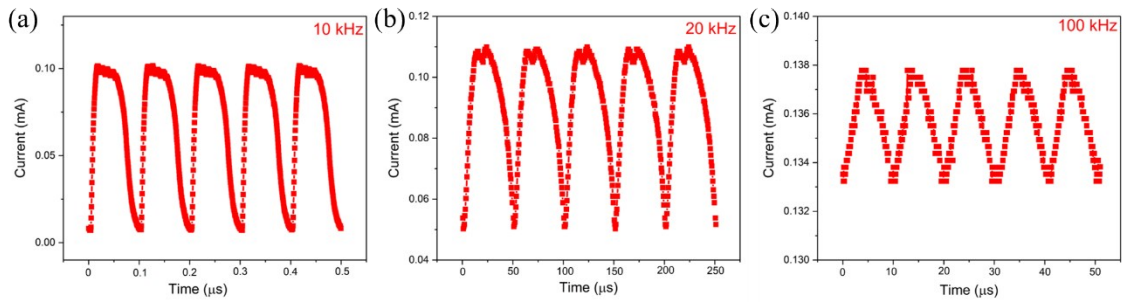

1

2 **Figure S9.** Photoreponse characteristics of the QDs-modified PDs to pulsed light irradiation at frequencies of (a) 10 kHz, (b) 20 kHz, (c) 100  
 3 kHz under a voltage of 0 V.

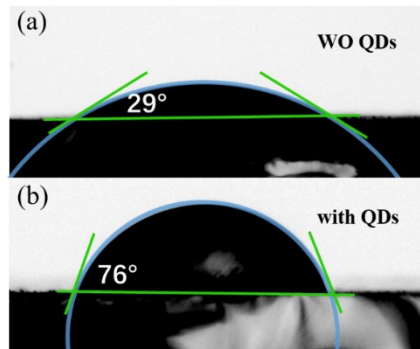

4

5 **Figure S10.** Water contact angle on the CsPbBr<sub>3</sub> films (a) WO and (d) with QDs.

6

**Table S2.** Fitting parameters extracted from EIS test.

| Device   | $R_s$ ( $\Omega$ ) | $R_{tr}$ ( $\Omega$ ) | $R_{rec}$ ( $\Omega$ ) |
|----------|--------------------|-----------------------|------------------------|
| WO QDs   | 13.7               | 1323                  | 3282                   |
| with QDs | 4.5                | 1926                  | 52320                  |

7
